# Supplementary material for: Analysis of Social Combinations of Coronavirus Vaccination: Evidence from a Conjoint Analysis
Source: bioRxiv or medRxiv preprint supplement (doi:10.1101/2021.06.13.21258654), 2021-06-15
Supplement: Supplementary file [file media-1.pdf]

# Supplementary Materials

Analysis of Social Combinations of Coronavirus Vaccination:  
Evidence from Conjoint analysis

June 9, 2021

## 1 Descriptive Statistics and Demographic Composition

Table 1: Descriptive statistics of demography (Yahoo Crowd Sourcing)

|                        | n    | mean   | sd     | median | trimmed | mad    | min  | max     | range   | skew  | kurtosis |
|------------------------|------|--------|--------|--------|---------|--------|------|---------|---------|-------|----------|
| age                    | 2927 | 46.22  | 11.25  | 46.00  | 46.29   | 10.38  | 4.00 | 86.00   | 82.00   | -0.05 | 0.01     |
| gender<br>(female=1)   | 2934 | 0.41   | 0.60   | 0.00   | 0.35    | 0.00   | 0.00 | 4.00    | 4.00    | 2.19  | 9.45     |
| education<br>(4year=1) | 2896 | 0.57   | 0.50   | 1.00   | 0.59    | 0.00   | 0.00 | 1.00    | 1.00    | -0.28 | -1.92    |
| income                 | 2934 | 602.77 | 432.23 | 526.00 | 552.71  | 335.07 | 0.00 | 3000.00 | 3000.00 | 2.03  | 7.40     |

Table 2: Descriptive statistics of demography (Lucid)

|                        | n    | mean   | sd     | median | trimmed | mad    | min  | max     | range   | skew  | kurtosis |
|------------------------|------|--------|--------|--------|---------|--------|------|---------|---------|-------|----------|
| age                    | 994  | 44.59  | 16.15  | 44.00  | 44.19   | 19.27  | 8.00 | 86.00   | 78.00   | 0.16  | -0.85    |
| gender<br>(female=1)   | 1024 | 1.53   | 0.55   | 2.00   | 1.51    | 1.48   | 1.00 | 4.00    | 3.00    | 0.61  | 0.78     |
| education<br>(4year=1) | 1010 | 0.53   | 0.50   | 1.00   | 0.54    | 0.00   | 0.00 | 1.00    | 1.00    | -0.14 | -1.98    |
| income                 | 1024 | 869.09 | 654.91 | 684.50 | 777.85  | 493.71 | 0.00 | 3000.00 | 3000.00 | 1.32  | 1.54     |

Table 3: Comparison between survey demographic and national census (Yahoo Crowd Sourcing)

|                                       | Census | YCS  | <i>t</i> -test results |
|---------------------------------------|--------|------|------------------------|
| <b>Age</b>                            |        |      |                        |
| 20-25                                 | 0.07   | 0.11 | $t = 0$                |
| 25-30                                 | 0.07   | 0.08 | $p$ -value = 1         |
| 30-35                                 | 0.08   | 0.11 |                        |
| 35-40                                 | 0.09   | 0.10 |                        |
| 40-45                                 | 0.10   | 0.11 |                        |
| 45-50                                 | 0.11   | 0.11 |                        |
| 50-55                                 | 0.10   | 0.10 |                        |
| 55-60                                 | 0.09   | 0.12 |                        |
| 60-65                                 | 0.09   | 0.07 |                        |
| 65-70                                 | 0.09   | 0.07 |                        |
| 70-75                                 | 0.11   | 0.04 |                        |
| <b>Gender</b>                         |        |      |                        |
| Female                                | 0.51   | 0.38 | $t = 0.0003$           |
| Male                                  | 0.49   | 0.62 | $p$ -value = 0.9998    |
| <b>Education</b>                      |        |      |                        |
| Elementary                            | 0.19   | 0.00 | $t = 0$                |
| High Schoole                          | 0.46   | 0.24 | $p$ -value = 1         |
| Two-year college                      | 0.15   | 0.19 |                        |
| Four-year college and graduate school | 0.20   | 0.57 |                        |
| <b>Income</b>                         |        |      |                        |
| 0-100                                 | 0.07   | 0.02 | $t = 0.136$            |
| 100-200                               | 0.13   | 0.07 | $p$ -value = 0.893     |
| 200-300                               | 0.14   | 0.12 |                        |
| 300-400                               | 0.13   | 0.12 |                        |
| 400-500                               | 0.10   | 0.12 |                        |
| 500-600                               | 0.09   | 0.14 |                        |
| 600-700                               | 0.07   | 0.08 |                        |
| 700-800                               | 0.06   | 0.08 |                        |
| 800-900                               | 0.05   | 0.08 |                        |
| 900-1000                              | 0.04   | 0.04 |                        |
| 1000-1100                             | 0.05   | 0.03 |                        |
| 1100-1400                             | 0.03   | 0.05 |                        |
| 1400-1600                             | 0.05   | 0.02 |                        |
| 1600-1800                             | 0.01   | 0.01 |                        |
| 1800-2000                             | 0.00   | 0.00 |                        |
| 2000-                                 | 0.01   | 0.02 |                        |

Table 4: Comparison between survey demographic and national census (Lucid)

|                                       | Census | Lucid | <i>t</i> -test results |
|---------------------------------------|--------|-------|------------------------|
| <b>Age</b>                            |        |       |                        |
| 20-25                                 | 0.07   | 0.02  | $t = 0$                |
| 25-30                                 | 0.07   | 0.04  | $p$ -value = 1         |
| 30-35                                 | 0.08   | 0.08  |                        |
| 35-40                                 | 0.09   | 0.12  |                        |
| 40-45                                 | 0.10   | 0.16  |                        |
| 45-50                                 | 0.11   | 0.21  |                        |
| 50-55                                 | 0.10   | 0.15  |                        |
| 55-60                                 | 0.09   | 0.11  |                        |
| 60-65                                 | 0.09   | 0.07  |                        |
| 65-70                                 | 0.09   | 0.04  |                        |
| 70-75                                 | 0.11   | 0.02  |                        |
| <b>Gender</b>                         |        |       |                        |
| Female                                | 0.51   | 0.50  | $t = 0.003$            |
| Male                                  | 0.49   | 0.50  | $p$ -value = 0.998     |
| <b>Education</b>                      |        |       |                        |
| Elementary                            | 0.19   | 0.02  | $t = 0$                |
| High School                           | 0.46   | 0.26  | $p$ -value = 1         |
| Two-year college                      | 0.15   | 0.19  |                        |
| Four-year college and graduate school | 0.20   | 0.53  |                        |
| <b>Income</b>                         |        |       |                        |
| 0-100                                 | 0.07   | 0.02  | $t = 0.168$            |
| 100-200                               | 0.13   | 0.04  | $p$ -value = 0.868     |
| 200-300                               | 0.14   | 0.09  |                        |
| 300-400                               | 0.13   | 0.09  |                        |
| 400-500                               | 0.10   | 0.09  |                        |
| 500-600                               | 0.09   | 0.11  |                        |
| 600-700                               | 0.07   | 0.06  |                        |
| 700-800                               | 0.06   | 0.08  |                        |
| 800-900                               | 0.05   | 0.05  |                        |
| 900-1000                              | 0.04   | 0.06  |                        |
| 1000-1100                             | 0.05   | 0.04  |                        |
| 1100-1400                             | 0.03   | 0.09  |                        |
| 1400-1600                             | 0.05   | 0.05  |                        |
| 1600-1800                             | 0.01   | 0.03  |                        |
| 1800-2000                             | 0.004  | 0.03  |                        |
| 2000-                                 | 0.01   | 0.08  |                        |
